# Supplementary material for: Early Identification of Resuscitated Patients with a Significant Coronary Disease in Out-of-Hospital Cardiac Arrest Survivors without ST-Segment Elevation
Source: MDPI journal article supplement (doi:10.3390/jcm10235688), 2021-12-02
Supplement: s1 [file s1]

**Table S1.** The definition and collection form of the variables in Korean Hypothermia Network prospective registry (KORHN-PRO).

| Variables                            | Definition                                                                                                                                                                                                                                                                                                                                                 | Collection form          |
|--------------------------------------|------------------------------------------------------------------------------------------------------------------------------------------------------------------------------------------------------------------------------------------------------------------------------------------------------------------------------------------------------------|--------------------------|
| Age                                  | Based on the date of birth.<br>If the date of birth is not known, record estimated age                                                                                                                                                                                                                                                                     | years                    |
| Gender                               | sex                                                                                                                                                                                                                                                                                                                                                        | Male/female              |
| Comorbid disease                     | The patient has a documented history of other disease conditions that existed before the cardiac arrest.                                                                                                                                                                                                                                                   |                          |
| Previous Arrest                      | Previous history of cardiac arrest                                                                                                                                                                                                                                                                                                                         | Yes/No/Unknown           |
| Previous acute myocardial infarction | Previous history of acute myocardial infarction                                                                                                                                                                                                                                                                                                            | Yes/No/Unknown           |
| Previous angina                      | Previous history of angina                                                                                                                                                                                                                                                                                                                                 | Yes/No/Unknown           |
| Previous arrhythmia                  | Previous history of cardiac arrhythmia                                                                                                                                                                                                                                                                                                                     | Yes/No/Unknown           |
| Chronic heart failure                | Previous history of chronic heart failure                                                                                                                                                                                                                                                                                                                  | Yes/No/Unknown           |
| Previous TIA or stroke               | Previous history of transient ischemic attack of stroke                                                                                                                                                                                                                                                                                                    | Yes/No/Unknown           |
| Hypertension                         | Previous history of hypertension                                                                                                                                                                                                                                                                                                                           | Yes/No/Unknown           |
| Diabetes mellitus                    | Previous history of diabetes mellitus                                                                                                                                                                                                                                                                                                                      | Yes/No/Unknown           |
| Pulmonary disease                    | Previous history of pulmonary disease such as asthma, COPD.                                                                                                                                                                                                                                                                                                | Yes/No/Unknown           |
| Neurologic disease other than CVA    | Previous history of neurologic disease other than CVA such as epilepsy                                                                                                                                                                                                                                                                                     | Yes/No/Unknown           |
| Chronic kidney disease               | Previous history of chronic kidney disease                                                                                                                                                                                                                                                                                                                 | Yes/No/Unknown           |
| Malignancy                           | Previous history of malignancy                                                                                                                                                                                                                                                                                                                             | Yes/No/Unknown           |
| Previous PCI                         | Previous history of PCI                                                                                                                                                                                                                                                                                                                                    | Yes/No/Unknown           |
| Previous CABG                        | Previous history of CABG                                                                                                                                                                                                                                                                                                                                   | Yes/No/Unknown           |
| Previous ischemic heart disease      | Previous history of AMI, PCI or CABG                                                                                                                                                                                                                                                                                                                       | Yes/No/Unknown           |
| Family history                       | Medical history of family                                                                                                                                                                                                                                                                                                                                  | Yes/No/Unknown           |
| Cardiac arrest                       | Family history of previous cardiac arrest                                                                                                                                                                                                                                                                                                                  | Yes/No/Unknown           |
| Angina or AMI                        | Family history of previous angina or AMI                                                                                                                                                                                                                                                                                                                   | Yes/No/Unknown           |
| CVA                                  | Family history of previous CVA                                                                                                                                                                                                                                                                                                                             | Yes/No/Unknown           |
| Arrhythmia                           | Family history of previous arrhythmia                                                                                                                                                                                                                                                                                                                      | Yes/No/Unknown           |
| Unknown                              | Unknown of family medical history                                                                                                                                                                                                                                                                                                                          | Yes/No/Unknown           |
| Arrest characteristics               |                                                                                                                                                                                                                                                                                                                                                            |                          |
|                                      | The initial rhythm is defined as the first cardiac rhythm present when the monitor or defibrillator is attached to the patient after a cardiac arrest.                                                                                                                                                                                                     | 1. VF                    |
|                                      |                                                                                                                                                                                                                                                                                                                                                            | 2. Pulseless VT          |
|                                      |                                                                                                                                                                                                                                                                                                                                                            | 3. PEA                   |
|                                      |                                                                                                                                                                                                                                                                                                                                                            | 4. Asystole              |
| Initial shockable rhythm             | Initial shockable rhythm is defined as ventricular fibrillation or pulseless ventricular tachycardia for the initial rhythm.                                                                                                                                                                                                                               |                          |
|                                      | The Unknown shockable is defined when shock was performed in an AED where ECG was not confirmed                                                                                                                                                                                                                                                            | 5. Unknown shockable     |
|                                      |                                                                                                                                                                                                                                                                                                                                                            | 6. Unknown non-shockable |
|                                      | The Unknown non-shockable is defined when shock was not performed in an AED where ECG was not confirmed                                                                                                                                                                                                                                                    | 7. Unknown               |
|                                      |                                                                                                                                                                                                                                                                                                                                                            |                          |
|                                      | Defined as a cardiac arrest that is seen or heard by another person or is monitored. EMS personnel respond to a medical emergency in an official capacity as part of an organized medical response team. Bystanders are all other groups including physicians, nurses, or paramedics who witness a cardiac arrest and initiate CPR but are not part of the | 1. Bystander witnessed   |
| Witnessed                            |                                                                                                                                                                                                                                                                                                                                                            | 2. EMS witnessed         |
|                                      |                                                                                                                                                                                                                                                                                                                                                            | 3. Unwitnessed           |
|                                      |                                                                                                                                                                                                                                                                                                                                                            | 4. Unknown               |

|                               |                                                                                                                                                                                                                                                                                                                 |                                                                                                                           |
|-------------------------------|-----------------------------------------------------------------------------------------------------------------------------------------------------------------------------------------------------------------------------------------------------------------------------------------------------------------|---------------------------------------------------------------------------------------------------------------------------|
|                               | organized rescue team                                                                                                                                                                                                                                                                                           |                                                                                                                           |
| Bystander CPR                 | Defined as CPR performed by a person who is not responding as part of an organized emergency response system to a cardiac arrest. Physicians, nurses, and paramedics may be described as performing bystander CPR if they are not part of the emergency response system involved in the victim's resuscitation. | Yes<br>No<br>Unknown                                                                                                      |
| Total collapse duration       | Time from collapse to return of spontaneous circulation (ROSC).<br>ROSC is defined according to a clinical assessment that shows signs of life comprising a palpable pulse or generating a blood pressure                                                                                                       | Minutes                                                                                                                   |
| Total doses of epinephrine    | Amount of epinephrine administered during CPR                                                                                                                                                                                                                                                                   | Milligram                                                                                                                 |
| Immediate ECG findings        | Findings from the ECG recorded for the first time after ROSC. However, do not record reciprocal change. Choose from the following 6 items. Multiple items can be selected.                                                                                                                                      | 1. STEMI<br>2. ST depression<br>3. LBBB<br>4. RBBB<br>5. Non-specific ST or T patterns<br>6. Normal ST segment and T wave |
| Immediate laboratory findings | The first test value after ROSC                                                                                                                                                                                                                                                                                 |                                                                                                                           |
| Artery blood gas analysis, pH | The first pH of blood gas analysis from arterial blood after ROSC                                                                                                                                                                                                                                               | pH                                                                                                                        |
| Lactate                       | The first lactate value after ROSC                                                                                                                                                                                                                                                                              | mmol/L                                                                                                                    |
| Glucose                       | The first glucose value after ROSC                                                                                                                                                                                                                                                                              | mg/dL                                                                                                                     |
| Creatinine                    | The first creatinine value after ROSC                                                                                                                                                                                                                                                                           | mg/dL                                                                                                                     |
| HbA1c                         | The first HbA1c value after ROSC                                                                                                                                                                                                                                                                                | %                                                                                                                         |
| Extracorporeal life support   | Whether ECMO was applied during hospitalization. When circulation using a pump is started before ROSC, it is defined as extracorporeal CPR, and when circulation is started after ROSC, it is defined as venous-arterial ECMO.                                                                                  | Yes/No                                                                                                                    |

AED, automated external defibrillator; AMI, acute myocardial infarction; CABG, coronary artery bypass grafting; COPD, chronic obstructive pulmonary disease; CPR, cardiopulmonary resuscitation; CVA, Cerebrovascular accident; ECG, electrocardiogram; ECMO, extracorporeal membrane oxygenation; EMS, emergency medical services; HbA1c, glycated hemoglobin; LBBB, left bundle branch block; PCI, percutaneous coronary intervention; PEA, pulseless electrical activity; RBBB, right bundle branch block; ROSC, return of spontaneous circulation; STEMI, ST segment elevation myocardial infarction; TIA, Transient ischemic attack; VF, ventricular fibrillation; VT, ventricular tachycardia.
